# Supplementary material for: Visfatin in the porcine pituitary gland: expression and regulation of secretion during the oestrous cycle and early pregnancy
Source: PubMed Central journal article supplement (PMC10600231; doi:10.1038/s41598-023-45255-4), 2023-10-25

# VISFATIN PROTEIN ABUNDANCE IN THE ANTERIOR PITUITARY

VISFATIN

protein ladder  
70 kDa

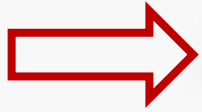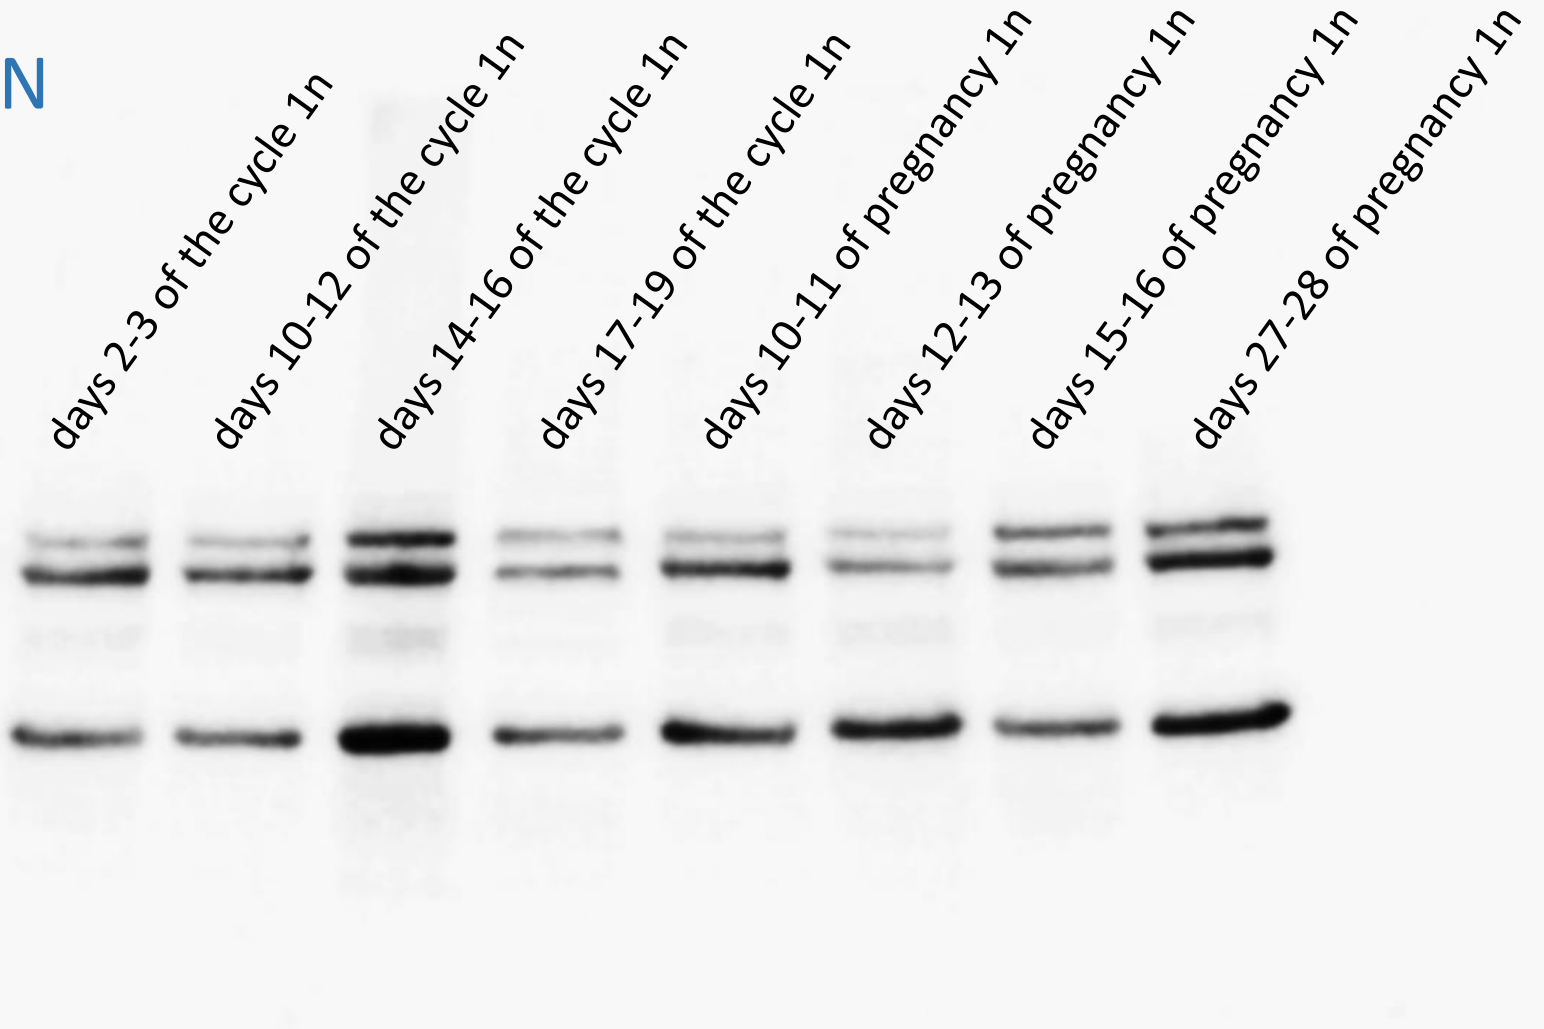

ACTIN

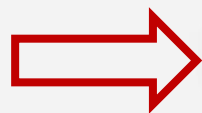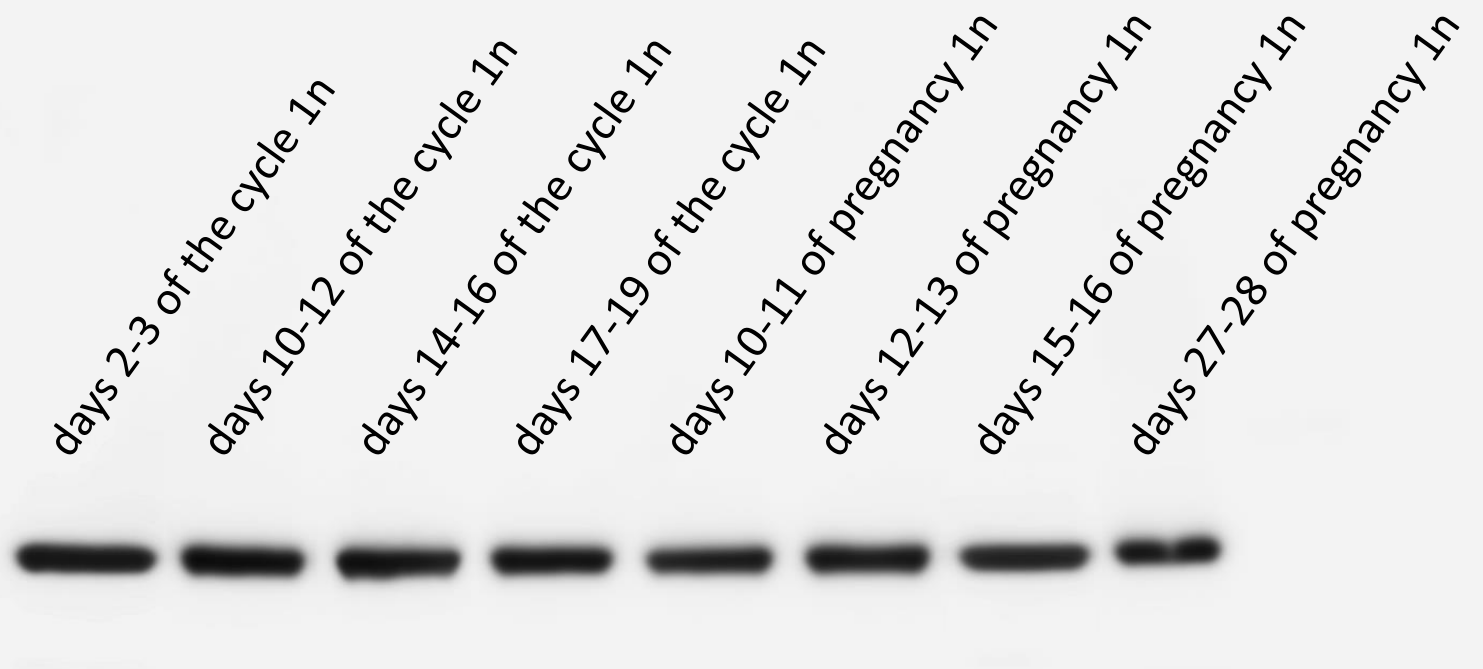

# VISFATIN PROTEIN ABUNDANCE IN THE POSTERIOR PITUITARY

VISFATIN

protein ladder  
70 kDa

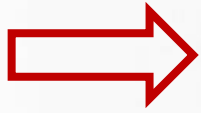

days 2-3 of the cycle 1n  
days 10-12 of the cycle 1n  
days 14-16 of the cycle 1n  
days 17-19 of the cycle 1n  
days 10-11 of pregnancy 1n  
days 12-13 of pregnancy 1n  
days 15-16 of pregnancy 1n  
days 27-28 of pregnancy 1n

ACTIN

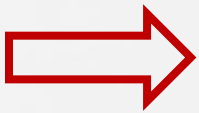

days 2-3 of the cycle 1n  
days 10-12 of the cycle 1n  
days 14-16 of the cycle 1n  
days 17-19 of the cycle 1n  
days 10-11 of pregnancy 1n  
days 12-13 of pregnancy 1n  
days 15-16 of pregnancy 1n  
days 27-28 of pregnancy 1n

# REGULATION OF VISFATIN PROTEIN CONCENTRATION IN THE ANTERIOR PITUITARY ON DAYS 2-3 OF THE CYCLE

VISFATIN

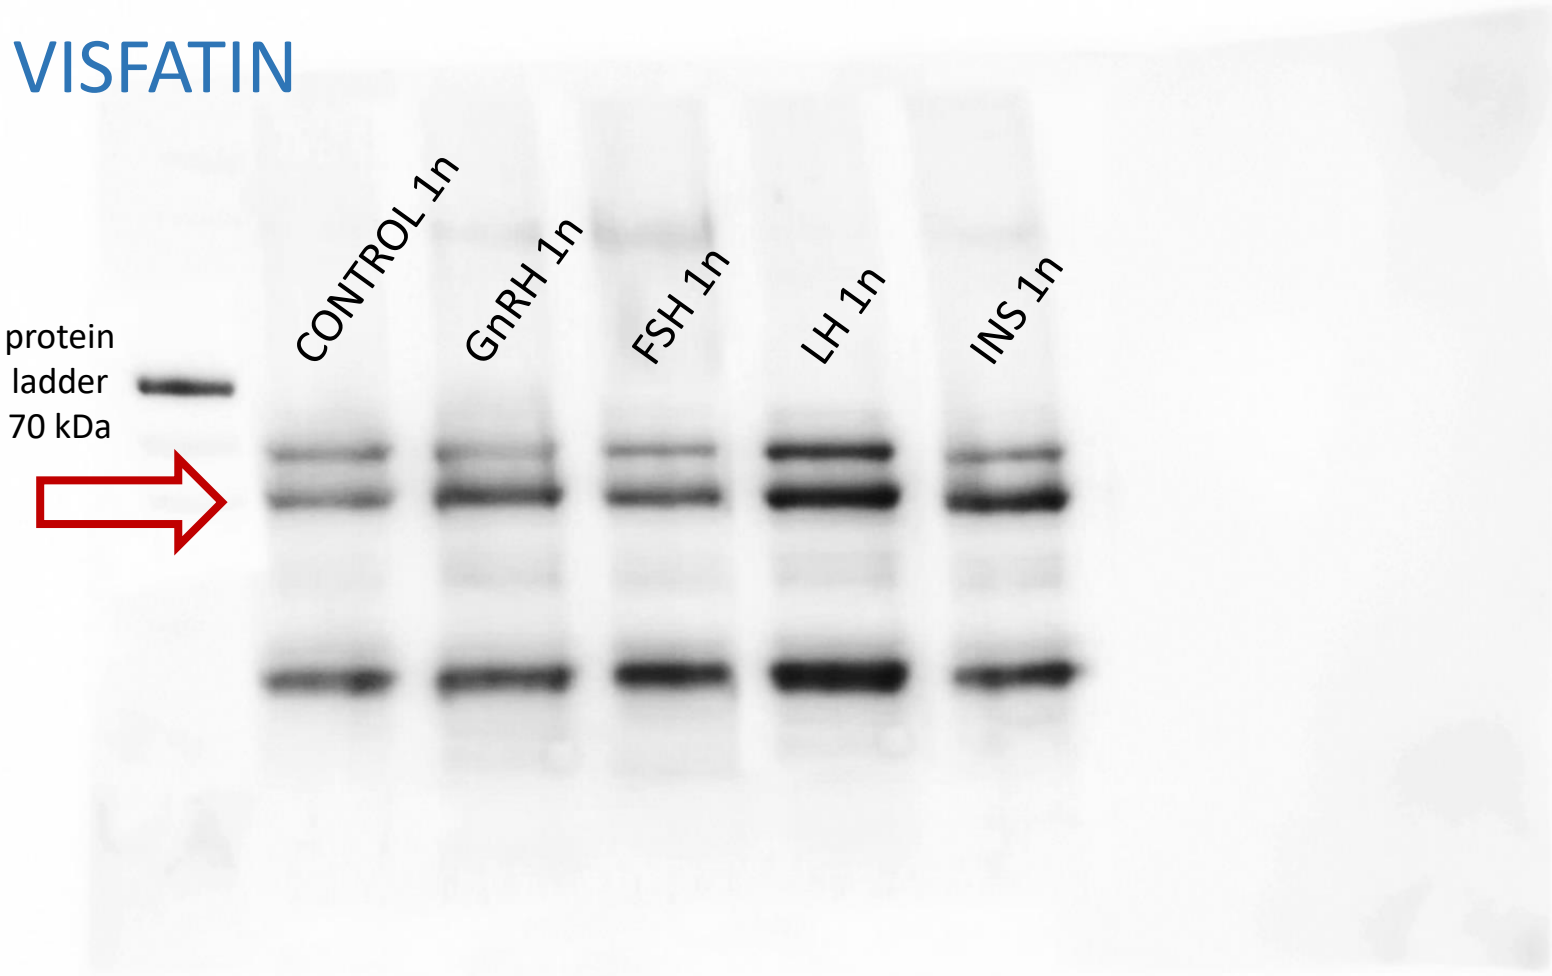

ACTIN

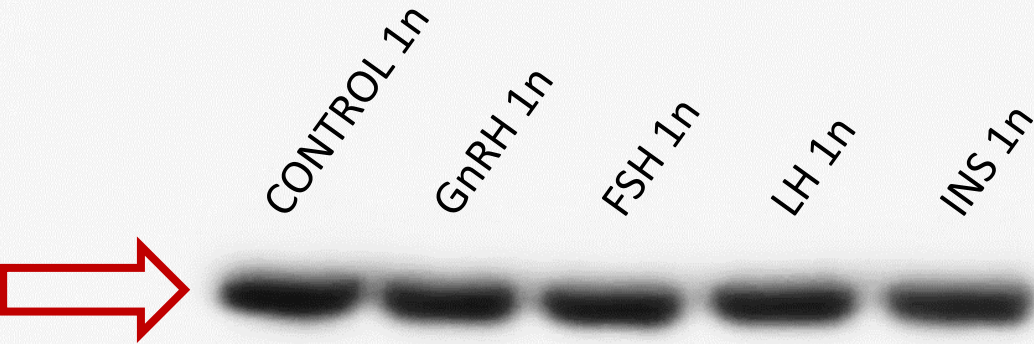

# REGULATION OF VISFATIN PROTEIN CONCENTRATION IN THE ANTERIOR PITUITARY ON DAYS 10-12 OF THE CYCLE

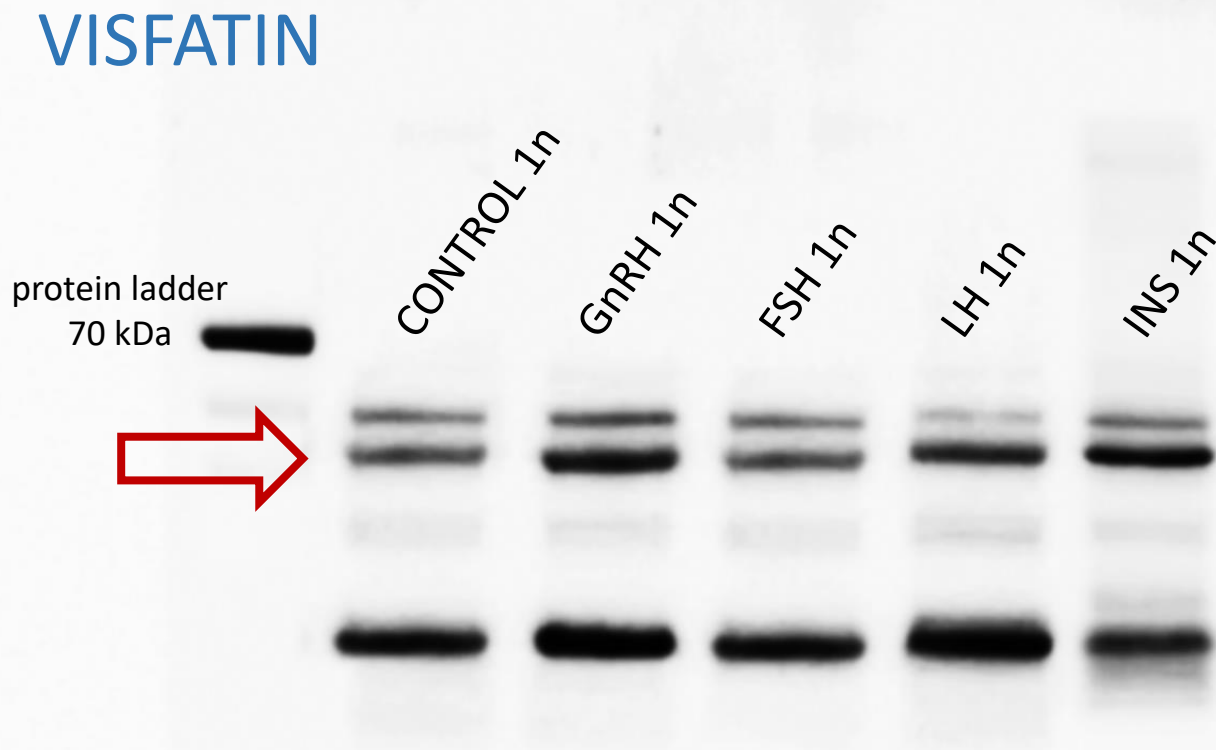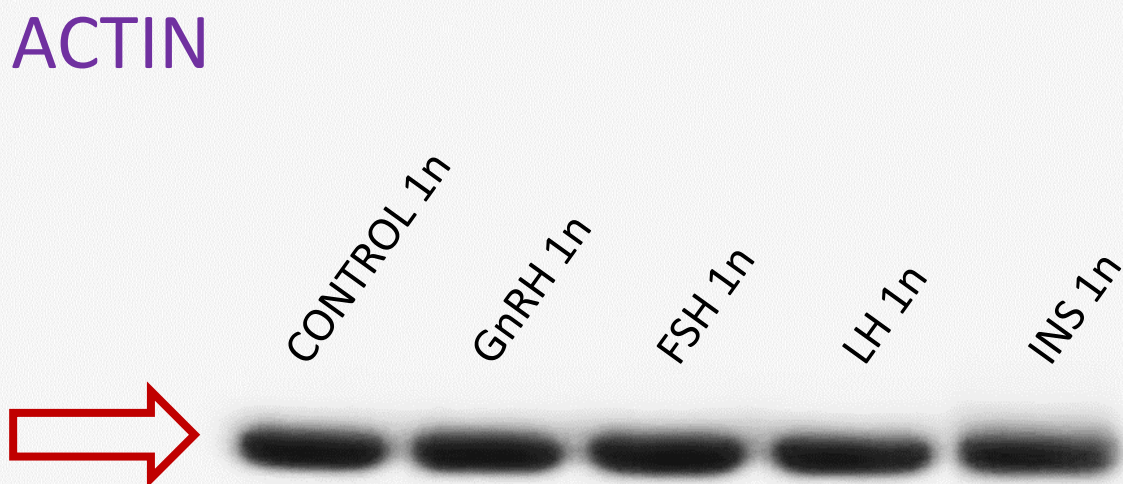

# REGULATION OF VISFATIN PROTEIN CONCENTRATION IN THE ANTERIOR PITUITARY ON DAYS 14-12 OF THE CYCLE

VISFATIN

protein ladder  
70 kDa

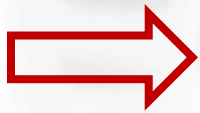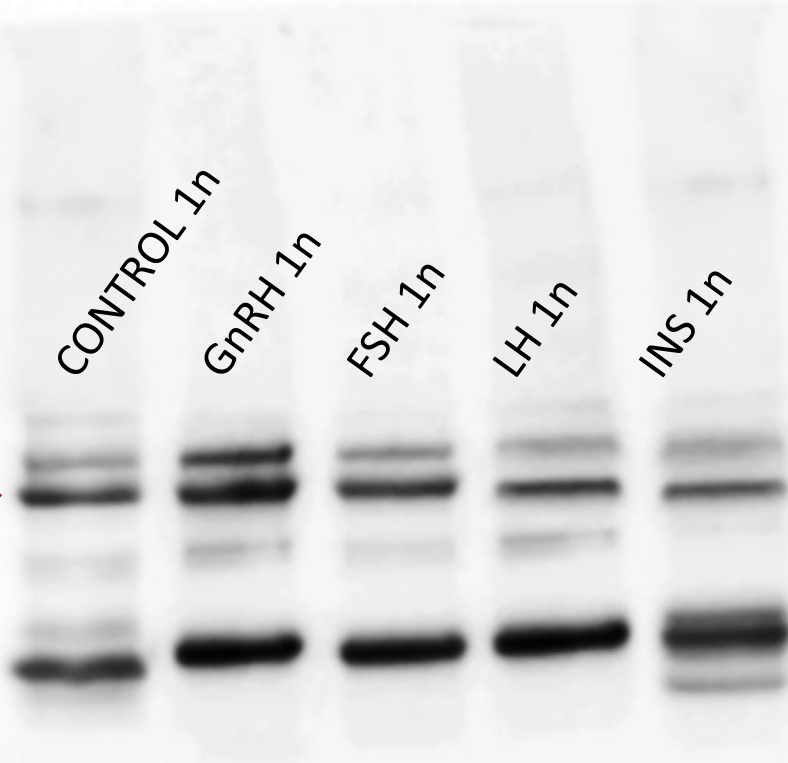

ACTIN

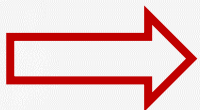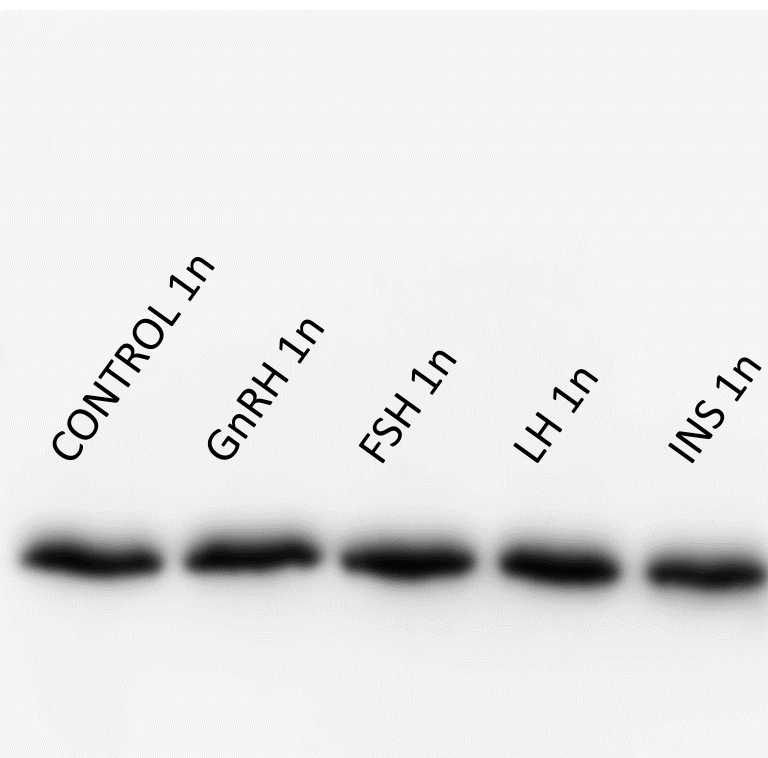

# REGULATION OF VISFATIN PROTEIN CONCENTRATION IN THE ANTERIOR PITUITARY ON DAYS 17-19 OF THE CYCLE

VISFATIN

protein ladder  
70 kDa

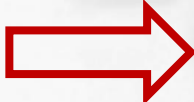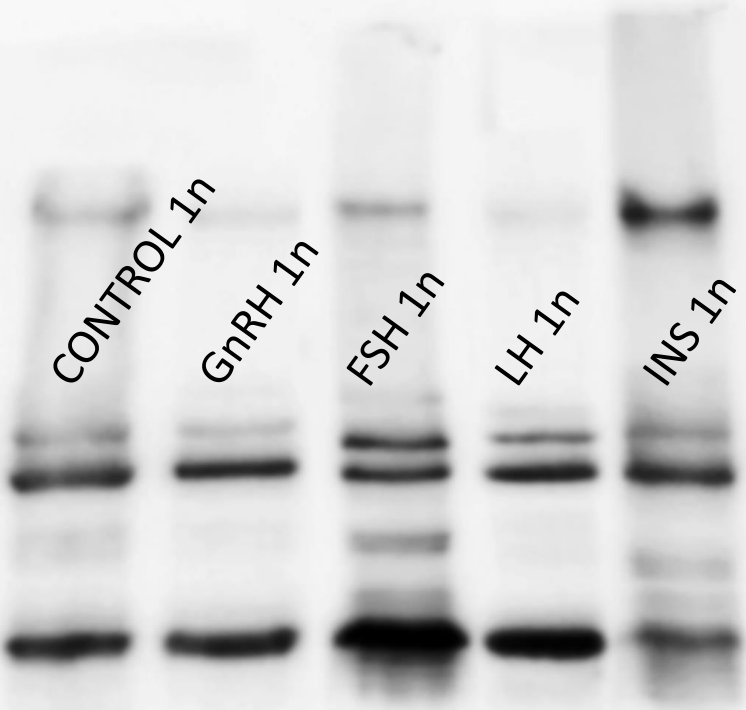

ACTIN

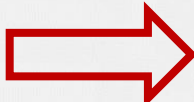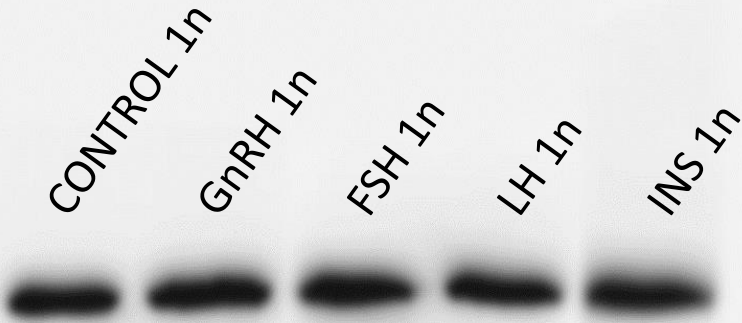

Supplement: 41598_2023_45255_MOESM1_ESM.pdf [file 41598_2023_45255_MOESM1_ESM.pdf]
